# Supplementary material
Source: PubMed Central journal article supplement (PMC3088625)
Supplement: 1013676108_pnas.1013676108_SI.pdf [file 1013676108_pnas.1013676108_SI.pdf]

# Supporting Information

Liu et al. 10.1073/pnas.1013676108

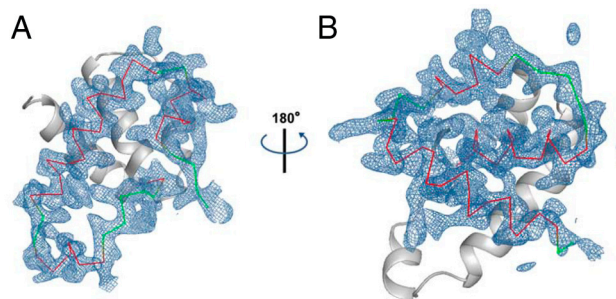

**Fig. S1.** Electron density maps showing the two sides of Orc6 molecule A in an asymmetric unit. (A) Electron density map showing the region covering helices 1, 2, and 3; (B) electron density map showing the region covering helices 4, 5, and 6. Electron density is shown as blue net lines and the protein is shown in red (for helices) and green (for loops) lines.

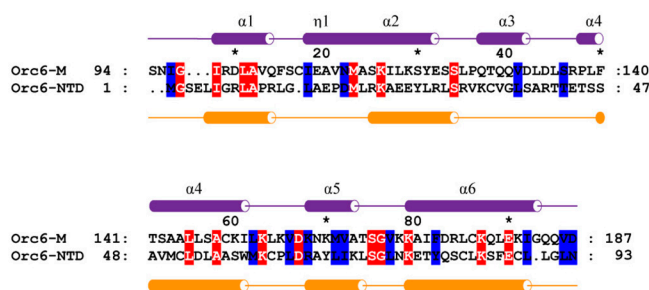

**Fig. S2.** Sequence alignment between two fragments [Orc6 middle region (Orc6-M, residues 94–187) and Orc6 amino-terminal domain (Orc6-NTD, residues 1–93)] of human Orc6. The secondary structure of Orc6-M is shown in cylinders colored in violet, whereas the predicted secondary structure of Orc6-NTD by PSIPRED server (<http://bioinf4.cs.ucl.ac.uk:3000/psipred/>) is shown in cylinders colored orange.

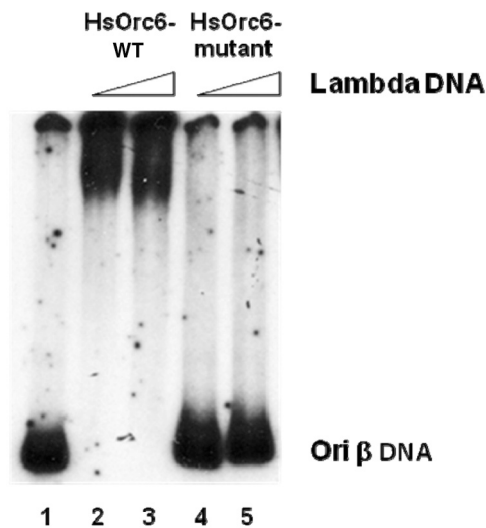

**Fig. S3.** DNA binding of human Orc6 to radiolabeled DNA fragment containing *Drosophila* ori- $\beta$  origin was monitored by electrophoretic mobility shift assays. Human Orc6 wild-type protein (Orc6-WT) (lanes 2 and 3) and Orc6 mutant protein containing mutations R137A, Q129A, and K168A (lanes 4 and 5) (50 ng each) were incubated with DNA fragment in the presence of increasing amounts of competitor lambda DNA. The amount of competitor was 50 and 100 ng. No protein was added to DNA fragment in lane 1.
